# Supplementary material
Source: PubMed Central journal article supplement (PMC3025060)
Supplement: NIHMS238347-supplement-1_si_001.pdf [file NIHMS238347-supplement-1_si_001.pdf]

## Supplementary Information

### **A p38 $\alpha$ Selective Chemosensor for use in Unfractionated Cell Lysates**

Cliff I. Stains, Elvedin Luković & Barbara Imperiali\*

Departments of Chemistry and Biology, Massachusetts Institute of Technology, 77  
Massachusetts Ave., Cambridge MA 02139

Correspondence should be addressed to B.I. ([imper@mit.edu](mailto:imper@mit.edu))

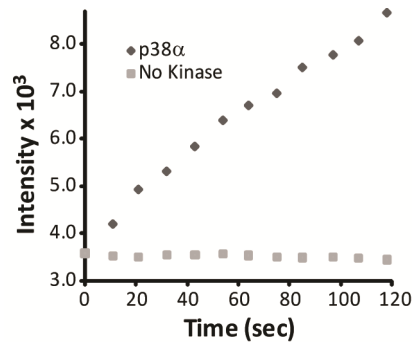

**Supplementary Figure S1.** MEF2A-C Sox is a substrate for p38 $\alpha$ . Initial phosphorylation reactions with and without the addition of kinase (15 nM) indicated that MEF2A-C Sox (1  $\mu$ M) was a substrate for p38 $\alpha$ .

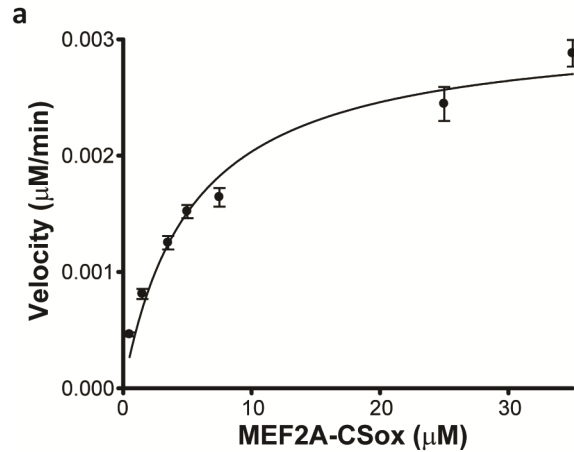

**b**

| Kinase       | $K_M$ ( $\mu\text{M}$ ) | $k_{\text{cat}}$ ( $\text{min}^{-1}$ ) | Catalytic Efficiency |
|--------------|-------------------------|----------------------------------------|----------------------|
| p38 $\alpha$ | 1.3                     | 74                                     | 17                   |
| p38 $\beta$  | 5.3                     | 18                                     | 1.0                  |

**Supplementary Figure S2.** Kinetic parameters of MEF2A-CSox for p38 $\beta$ . **a)** A direct fit of a velocity versus MEF2A-CSox concentration plot using the Briggs-Haldane equation (1 ng p38 $\beta$ ). **b)** Kinetic parameters of MEF2A-CSox for the indicated kinases, demonstrating that MEF2A-CSox is a more efficient substrate for p38 $\alpha$ . Catalytic efficiency was determined using relative  $k_{\text{cat}}/K_M$  values.

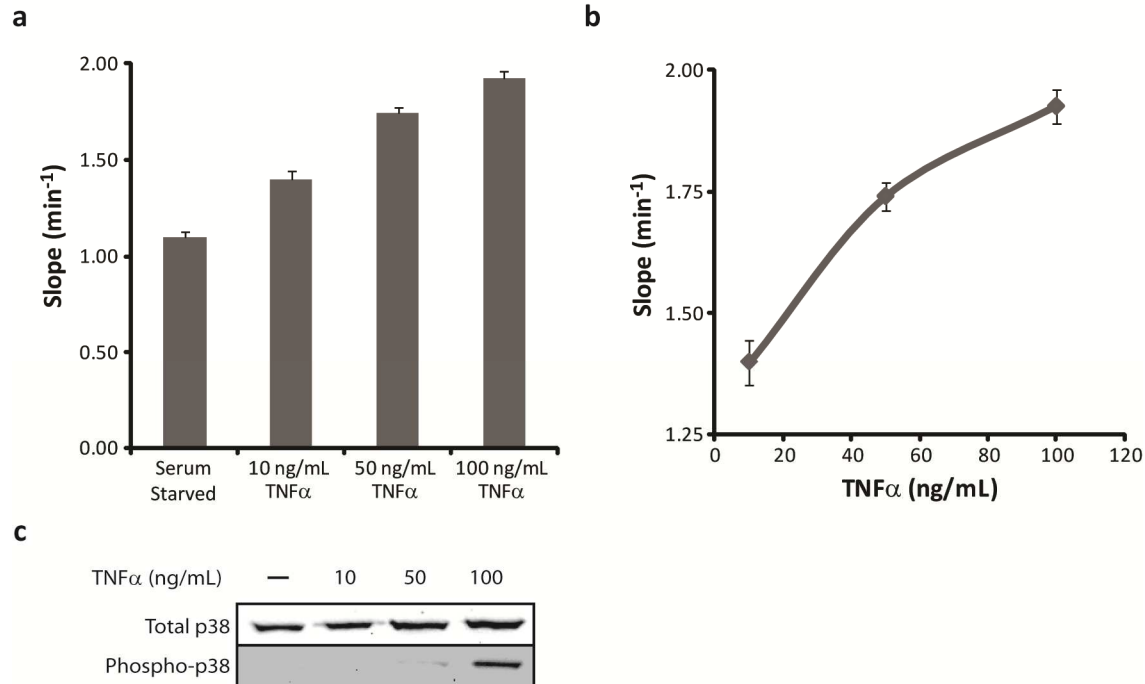

**Supplementary Figure S3.** MEF2A-CSox phosphorylation varies with TNF $\alpha$  stimulation. **a)** Fluorescence slopes of reactions conducted without staurosporine using 1  $\mu$ M substrate and 5  $\mu$ g of HeLa lysates derived from cells stimulated for 10 min with the indicated amount of TNF $\alpha$ . Assays were also performed with lysates from untreated (serum starved) cells. **b)** The relationship between MEF2A-CSox phosphorylation and the amount of TNF $\alpha$  used for stimulation. **c)** A western blot of the indicated lysates with the corresponding antibodies, demonstrating increased phosphorylation of p38 with increasing amounts of TNF $\alpha$ .

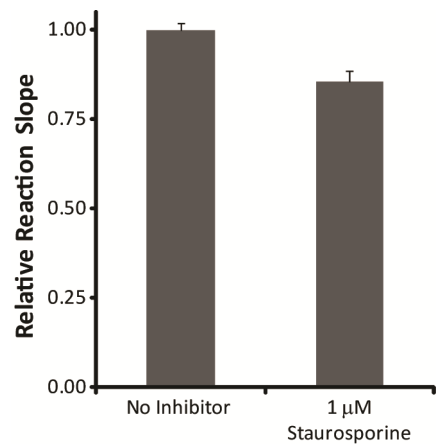

**Supplementary Figure S4.** Staurosporine does not significantly alter p38 $\alpha$  activity (1).

Reactions were performed using 1 nM recombinant p38 $\alpha$  and 1  $\mu$ M substrate.

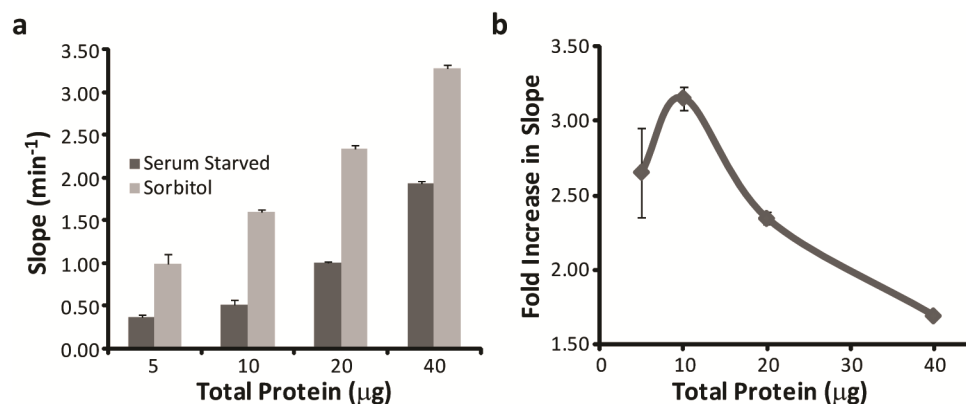

**Supplementary Figure S5.** The effect of the amount of lysate used in the assay on the rate of phosphorylation of MEF2A-CSox. **a)** Reactions conducted with 1  $\mu\text{M}$  substrate and the indicated amount of serum starved and sorbitol-stimulated HeLa lysates. **b)** The fold change in reaction slope between sorbitol-stimulated and serum starved lysates with respect to the amount of lysate used in the assay. The assay is most sensitive when 10  $\mu\text{g}$  of lysate is used. Presumably the sensitivity of the assay decreases with increasing concentrations of lysate due to the increasing amounts of off-target kinases. All reactions contained 1  $\mu\text{M}$  staurosporine.

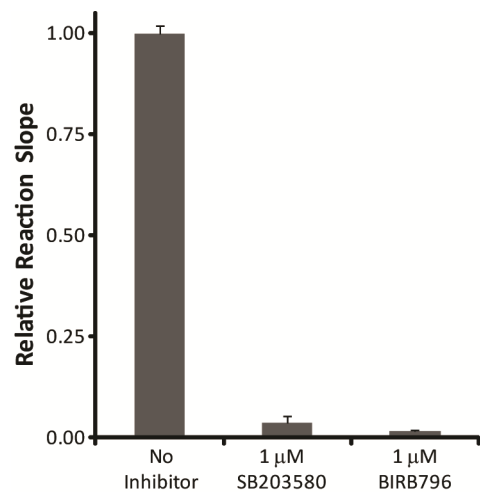

**Supplementary Figure S6.** The addition of 1  $\mu\text{M}$  SB203580 or BIRB796 completely abolishes recombinant p38 $\alpha$  activity. Reactions were conducted with 1  $\mu\text{M}$  substrate and 1 nM recombinant enzyme. Slopes for assays containing the slow-binding inhibitor BIRB796 were determined after incubation of the entire reaction at 30  $^{\circ}\text{C}$  for 30 min prior to data collection, after which fluorescence increases were linear with respect to time.

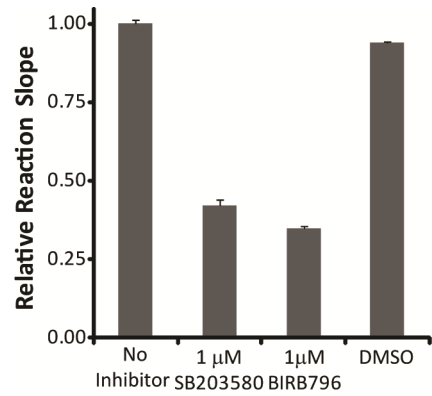

**Supplementary Figure S7.** The inhibitor solvent, DMSO, does not influence the phosphorylation of MEF2A-CSox. Assays were conducted using 1  $\mu$ M MEF2A-CSox and 10  $\mu$ g of sorbitol-stimulated HeLa lysates with the indicated inhibitor. All reactions contained 1  $\mu$ M staurosporine.



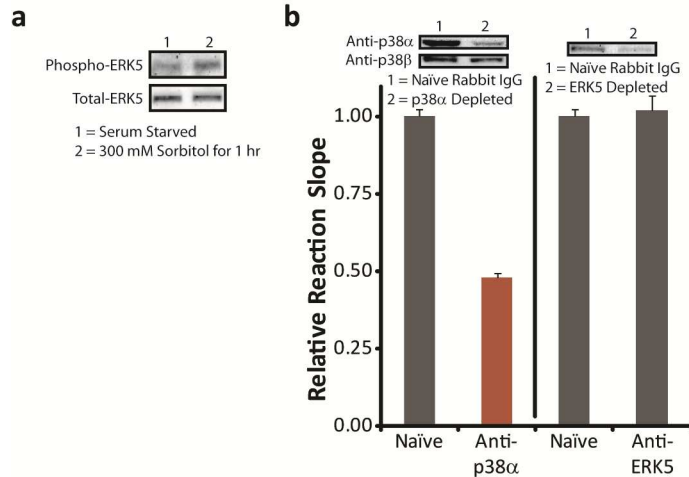

**Supplementary Figure S8.** The related ERK5 kinase does not significantly contribute to the phosphorylation of MEF2A-CSox (1  $\mu$ M) in sorbitol-stimulated HeLa cell lysates. **a)** Western blot analysis of sorbitol-stimulated lysates demonstrating activation of ERK5. **b)** Immunodepletion of p38 $\alpha$  leads to a dramatic decrease in MEF2A-CSox phosphorylation (left) while depletion of ERK5 demonstrated no significant loss of signal (right). Values were background subtracted using the activity remaining in the input lysates after addition of 1  $\mu$ M SB203580. Western blots of the respective lysates demonstrating depletion of the target kinase are shown in the insets of each panel. Note that p38 $\beta$  levels remain unchanged, indicating that the remaining MEF2A-CSox activity is likely due to residual p38 $\alpha$  (~30% remaining by gel densitometry). All reactions contained 1  $\mu$ M staurosporine.

| Kinase       | Inhibitor |         |               |
|--------------|-----------|---------|---------------|
|              | SB203580  | BIRB796 | Staurosporine |
| p38 $\alpha$ | 12        | 0.37    | >10,000       |
| p38 $\beta$  | 70        | 1,500   | >10,000       |
| p38 $\gamma$ | 1,500     | 19      | 42            |
| JNK1         | 1,100     | >10,000 | 220           |
| JNK2         | 130       | 7.3     | >10,000       |
| JNK3         | 35        | 110     | 110           |
| ERK1         | >10,000   | >10,000 | 8,400         |
| ERK2         | >10,000   | >10,000 | 7,300         |
| ERK5         | >10,000   | >10,000 | 1,600         |

K<sub>d</sub> in nM

**Supplementary Table S1.** Reported dissociation constants of SB203580, BIRB796, and staurosporine for the indicated kinase are given (1).

## References

1. Karaman, M. W., Herrgard, S., Treiber, D. K., Gallant, P., Atteridge, C. E., Campbell, B. T., Chan, K. W., Ciceri, P., Davis, M. I., Edeen, P. T., Faraoni, R., Floyd, M., Hunt, J. P., Lockhart, D. J., Milanov, Z. V., Morrison, M. J., Pallares, G., Patel, H. K., Pritchard, S., Wodicka, L. M., and Zarrinkar, P. P. (2008) A quantitative analysis of kinase inhibitor selectivity, *Nat. Biotechnol.* 26, 127-132.
